# Supplementary material for: Towards Understanding the Development of Breast Cancer: The Role of RhoJ in the Obesity Microenvironment
Source: MDPI journal article supplement (doi:10.3390/cells13020174), 2024-01-17
Supplement: s1 [file s1]

## *Supplementary Material*

| CCKR         |             | Cytoskeletal |             |
|--------------|-------------|--------------|-------------|
| MMP9         | 3.03373225  | RHOJ         | 3.57268381  |
| TACR1        | 3.55882924  | PAK6         | 2.12772342  |
| PPARG        | -2.56274214 | ACTC1        | 2.0582063   |
| CXCL8        | 2.43832086  | ACTRT3       | 2.57750964  |
| MAP2K6       | 4.26999554  | Inflammation |             |
| IER3         | -2.04589872 | GNG7         | -2.45354002 |
| KLF4         | -2.62024641 | PLCL1        | 6.48029635  |
| PTGS2        | 1.96082872  | PAK6         | 2.12772342  |
| CXCL2        | 3.09473238  | CCR3         | 4.05285136  |
| Angiogenesis |             | ACTC1        | 2.0582063   |
| GRB7         | -3.22948866 | CCL7         | 5.64774207  |
| KDR          | -2.4390147  | ACTRT3       | 2.57750964  |
| PDGFD        | 2.52043163  | CAMK2B       | -3.35551385 |
| PRKCG        | -4.02093121 | CXCL8        | 2.43832086  |
| WNT10A       | 8.79415877  | FPR3         | 3.26356853  |
| PTPRB        | -2.11744944 | IL6          | 2.11546865  |
| FZD3         | 2.3160884   | PTGS2        | 1.96082872  |
| WNT2B        | -2.5043281  | FPR1         | 4.85067119  |
| GNG7         | -2.45354002 | CCRL2        | 2.89988295  |
| GNG11        | 2.10527558  | CCR1         | 2.64908721  |
|              |             | C3AR1        | 3.45056365  |
|              |             | CXCR2        | -6.365593   |
|              |             | ITGA4        | -2.07199983 |
|              |             | CCR5         | 5.66479864  |

**Supplementary Figure S1:** Gene panel selection. After genes classification into two different groups, upregulated and downregulated genes, they were analyzed with the online software PANTHER and classified into different pathways. Genes were selected based on their function in carcinogenesis (angiogenesis and cytoskeletal modulation) and inflammation and on their fold change.

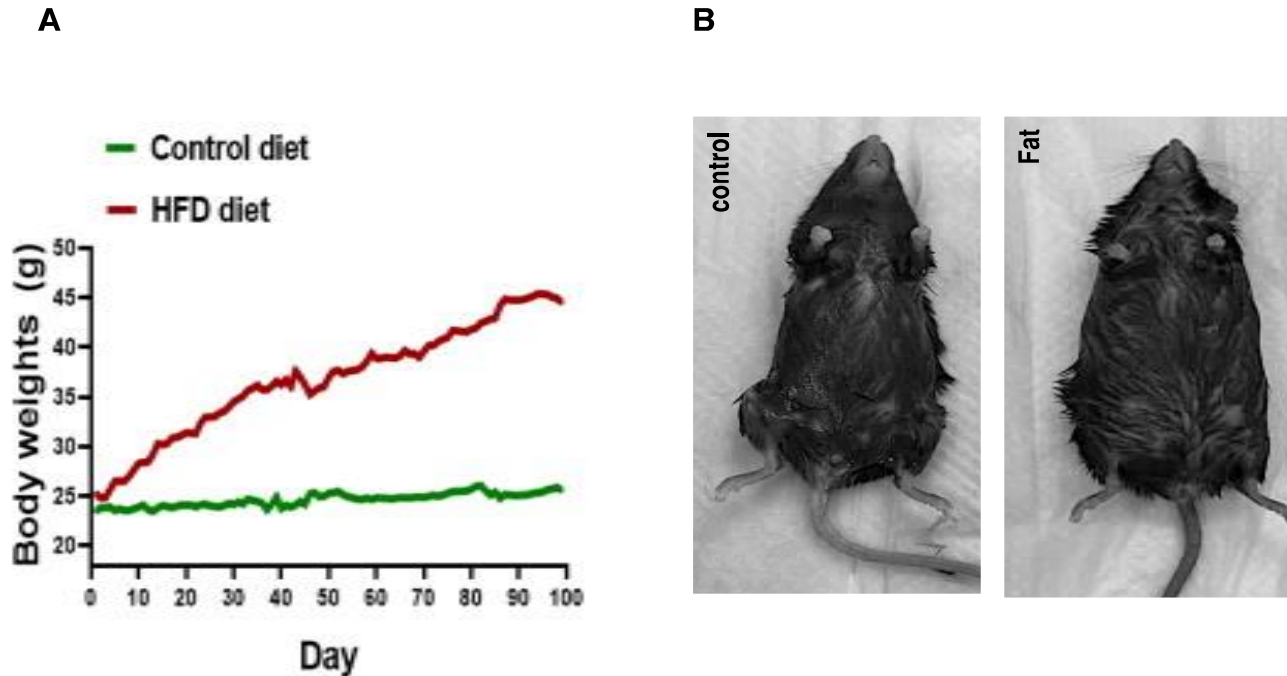

**Supplementary Figure S2: (A) Graph representing the body weight evolution between the two mice groups for 100 days.** Two groups of mice were used, with 3 mice per group. One group of mice was given standard chow diet (control group), and the other group was given high-fat diet food (HFD diet) for nearly 4 months. Every 10 days, the mice were weighted until the HFD diet group mice weight twice the control diet group mice. **(B)** Photo representing one mouse of each group.
